# Supplementary material for: Methanesulfonic acid (MSA) and SO3 formation from the addition channel of atmospheric dimethyl sulfide oxidation
Source: Royal Society of Chemistry journal article supplement (doi:10.1039/d4cc05913a), 2024-12-18
Supplement: d4cc05913a1.pdf [file d4cc05913a1.pdf]

# Methanesulfonic acid (MSA) and SO<sub>3</sub> formation from the addition channel of atmospheric dimethyl sulfide oxidation

Torsten Berndt

## Contents

|                                                            |          |
|------------------------------------------------------------|----------|
| <b>1. Experimental approach and product analysis</b> ..... | <b>2</b> |
| <b>2. Kinetic analysis</b> .....                           | <b>3</b> |
| <b>3. Reaction mechanism</b> .....                         | <b>4</b> |
| <b>4. Additional figures</b> .....                         | <b>5</b> |
| <b>5. References</b> .....                                 | <b>8</b> |

## 1. Experimental approach and product analysis

The experiments were carried out in a laminar flow tube (LFT), operating at 1 bar of air at a temperature of  $295 \pm 0.5$  K and a relative humidity of  $< 0.1$  %. A humidity sensor (Hygrosense HYTE) continuously controlled the relative humidity of the reaction gas. The total flow was set at  $30 \text{ L min}^{-1}$  (STP) resulting in a reaction time of 32 s, as experimentally determined using a “chemical clock”. More detailed information on the experimental set-up is given elsewhere.<sup>1,2</sup>

Photolysis of isopropyl nitrite (IPN) by 24 36 W BLB lamps, emitting in the range 350 - 400 nm, was chosen for OH radical production. IPN photolysis forms  $i\text{-C}_3\text{H}_7\text{O}$  radicals and NO followed by the rapid reaction of  $i\text{-C}_3\text{H}_7\text{O}$  radicals with  $\text{O}_2$  generating  $\text{HO}_2$  radicals. Finally, the OH radical formation proceeds via the reaction  $\text{NO} + \text{HO}_2 \rightarrow \text{OH} + \text{NO}_2$ .<sup>3</sup>

For dosing dimethyl sulfoxide ( $\text{CH}_3\text{S}(\text{O})\text{CH}_3$ ), a vial containing this substance was directly connected to the main air stream just before entering the LFT. Diffusion of  $\text{CH}_3\text{S}(\text{O})\text{CH}_3$  from the vial was sufficient to get the desired  $\text{CH}_3\text{S}(\text{O})\text{CH}_3$  concentration in the reaction gas. The concentration was continuously controlled at the outflow of the flow system by means of a proton transfer reaction mass spectrometer (Ionicon, PTR-MS 500) measuring the calibrated  $(\text{CH}_3\text{S}(\text{O})\text{CH}_3)\text{H}^+$  signal.

The initial  $\text{CH}_3\text{S}(\text{O})\text{CH}_3$  concentration of  $4.2 \times 10^{10}$  molecules  $\text{cm}^{-3}$ , significantly higher than atmospheric level, allowed to follow product formation from secondary OH chemistry under the chosen reaction conditions, i.e., the products arising from the  $\text{OH} + \text{CH}_3\text{S}(\text{O})\text{CH}_3$  reaction. The  $\text{CH}_3\text{S}(\text{O})\text{CH}_3$  conversion was below  $\sim(2 - 3) \times 10^8$  molecules  $\text{cm}^{-3}$ , that keeps the concentration of reactive intermediates low enough, i.e., below  $\sim 10^8$  and mostly below  $10^7$  molecules  $\text{cm}^{-3}$ . Thus, unwanted bimolecular steps, such as  $\text{CH}_3\text{SO}_2\text{OO} + \text{RO}_2$  (path **9** in Scheme 1) or any  $\text{CH}_3\text{SO}_3$  reactions with peroxy species etc., were unimportant for the material balance even for bimolecular rate coefficients being close to the collision limit. This ensured the simplified data analysis as carried out. Relatively high concentrations of NO, higher than over the oceans, were used in order to elevate the  $\text{CH}_3\text{SO}_3$  formation via path **8**. Consequently, the product concentrations of  $\text{SO}_3$  and MSA were higher compared with low-NO conditions. The approach of determination of the temperature dependence of  $k_{11}$  is not affected by enhanced  $\text{SO}_3$  concentrations using MSA formation via path **12** as the reference (assuming almost constant H-donor concentrations within a measurement series and an almost temperature-independent rate coefficient  $k_{12}$ ).

All gas flows were set by means of calibrated gas flow controllers (MKS 1259/1179). The organic reactants and gases had the following purity: dimethyl sulfoxide ( $> 99.9$  %, Aldrich), NO ( $498 \pm 10$  ppmV NO (99.5 %) in  $\text{N}_2$  (99.999 %), Air Liquide) and  $\text{NO}_2$  ( $\geq 99.5$  %, Aldrich). Needed gas mixtures were prepared by means of a gas mixing unit using He as the dilution gas. Purified air was taken from a commercial PSA (Pressure Swing Adsorption) unit with further purification by a series of absorber units filled with hopcalite ( $\text{CuMnO}_x$  catalyst), activated charcoal and different 4 Å and 10 Å molecular sieves.

Product formation was followed by means of a CI-APi-TOF (chemical ionization – atmospheric pressure interface – time-of-flight) mass spectrometer (Tofwerk AG, Airmodus) with a resolving power  $> 3000$  Th/Th sampling from the center flow of the LFT with a rate of  $10 \text{ L min}^{-1}$  (STP). The ion-molecule reaction (IMR) took place at atmospheric pressure using a

Boulder-type inlet system.<sup>4</sup> As the reagent ions served iodide (I<sup>-</sup>), bromide (Br<sup>-</sup>), and nitrate (NO<sub>3</sub><sup>-</sup>). Their precursors tert-butyl iodide, tert-butyl bromide and nitric acid, respectively, were added to a 35 L min<sup>-1</sup> (STP) sheath flow of high-purity nitrogen forming the respective reagent ions after ionization with an <sup>241</sup>Am source.

CH<sub>3</sub>S(O)OH, H<sub>2</sub>SO<sub>3</sub> and CH<sub>3</sub>SO<sub>2</sub>OONO<sub>2</sub> were detected as the corresponding iodide adducts, (analyte)I<sup>-</sup>, and SO<sub>2</sub> as (SO<sub>2</sub>)Br<sup>-</sup> adduct. MSA and SO<sub>3</sub> were measured by means of nitrate ionization following the CH<sub>3</sub>SO<sub>3</sub><sup>-</sup> and the (CH<sub>3</sub>SO<sub>3</sub>H)NO<sub>3</sub><sup>-</sup> signals or the SO<sub>4</sub><sup>-</sup> and the (SO<sub>3</sub>)NO<sub>3</sub><sup>-</sup> signals, respectively. Calibration factors needed for determination of product concentrations as well as their uncertainties were the same as described previously.<sup>5</sup> In the case of CH<sub>3</sub>SO<sub>2</sub>OONO<sub>2</sub>, only lower limit concentrations with an uncertainty of a factor of two can be stated. Diffusion controlled wall loss for all products was considered using in each case  $k_{\text{loss}} = 0.018 \text{ s}^{-1}$ , see explanation in Berndt et al.<sup>5</sup>

## 2. Kinetic analysis

The rate law of  $\text{CH}_3\text{SO}_3$  product formation, “ $\text{CH}_3\text{SO}_3$ -prod” meaning  $\text{SO}_3$  and MSA, is given by:

$$\frac{d[\text{CH}_3\text{SO}_3 - \text{prod.}]}{dt} = k_8 [\text{NO}] \times [\text{CH}_3\text{SO}_2\text{OO}] \#(S1)$$

The rate law for  $\text{CH}_3\text{SO}_2\text{OO}$  reads as follows:

$$\frac{d[\text{CH}_3\text{SO}_2\text{OO}]}{dt} = k_5 [\text{O}_2] \times [\text{CH}_3\text{SO}_2] - k_{-5} [\text{CH}_3\text{SO}_2\text{OO}] - k_8 [\text{NO}] \times [\text{CH}_3\text{SO}_2\text{OO}] \#(S2)$$

Steady-state approximation and the relationship  $k_8 [\text{NO}] \ll k_{-5}$  leads to:

$$[\text{CH}_3\text{SO}_2\text{OO}]_{ss} = \frac{k_5}{k_{-5}} [\text{O}_2] \times [\text{CH}_3\text{SO}_2] \#(S3)$$

Inserting Eq.S3 into Eq.S1 results in Eq.S4:

$$\frac{d[\text{CH}_3\text{SO}_3 - \text{prod.}]}{dt} = \frac{k_8 \times k_5}{k_{-5}} [\text{NO}] \times [\text{O}_2] \times [\text{CH}_3\text{SO}_2] \#(S4)$$

The rate law of  $\text{SO}_2$  formation is given by:

$$\frac{d[\text{SO}_2]}{dt} = k_6 [\text{CH}_3\text{SO}_2] \#(S5)$$

Eq.S4 and Eq.S5 result in Eq.S6 given that NO is not significantly consumed in the course of the reaction.

$$\frac{[\text{CH}_3\text{SO}_3 - \text{prod.}]}{[\text{SO}_2]} = \frac{[\text{SO}_3] + [\text{MSA}]}{[\text{SO}_2]} = \frac{k_8}{k_6} \frac{k_5}{k_{-5}} [\text{O}_2] \times [\text{NO}] \#(S6)$$

The measured ratio  $([\text{SO}_3] + [\text{MSA}]) / [\text{SO}_2]$  as a function of NO allows a rough estimate of the equilibrium constant  $K_5 = k_5 / k_{-5}$  within the proposed reaction scheme given in Scheme 1 as long as  $\text{NO}_2$  reactions can be neglected. Rate coefficients  $k_6$  and  $k_8$  must be taken from the literature.

### 3. Reaction mechanism

This mechanism was used to calculate the HO<sub>2</sub> level and the HCHO production as well as the fraction of non-reacted CH<sub>3</sub>SO<sub>3</sub> for the reaction time of 32 s. A comparison of measured CH<sub>3</sub>S(O)OH (MSIA) products with results from modeling confirmed the applicability of this mechanism, see Figure S3 in Berndt et al.<sup>5</sup>.

**Table S1:** Reaction scheme describing the processes in the LFT. Rate coefficients at 295 K were taken from literature or have been estimated.

| Reaction                                                                                                                                                                  | Rate coefficient<br>(cm <sup>3</sup> molecule <sup>-1</sup> s <sup>-1</sup> or s <sup>-1</sup> ) |
|---------------------------------------------------------------------------------------------------------------------------------------------------------------------------|--------------------------------------------------------------------------------------------------|
| IPN (+O <sub>2</sub> ) → NO + HO <sub>2</sub> + acetone                                                                                                                   | 0.00039                                                                                          |
| NO + HO <sub>2</sub> → OH + NO <sub>2</sub>                                                                                                                               | 8.9×10 <sup>-12, 6</sup>                                                                         |
| OH + HO <sub>2</sub> → H <sub>2</sub> O + O <sub>2</sub>                                                                                                                  | 1.1×10 <sup>-10, 6</sup>                                                                         |
| HO <sub>2</sub> + HO <sub>2</sub> → H <sub>2</sub> O <sub>2</sub> + O <sub>2</sub>                                                                                        | 1.65×10 <sup>-12, 6</sup>                                                                        |
| OH + NO → HNO <sub>2</sub>                                                                                                                                                | 9.7×10 <sup>-12, 6</sup>                                                                         |
| OH + NO <sub>2</sub> → HNO <sub>3</sub>                                                                                                                                   | 1.2×10 <sup>-11, 6</sup>                                                                         |
| OH + DMSO (+O <sub>2</sub> ) → MSIA + CH <sub>3</sub> O <sub>2</sub>                                                                                                      | 8.7×10 <sup>-11, 7</sup>                                                                         |
| CH <sub>3</sub> O <sub>2</sub> + HO <sub>2</sub> → ROOH + O <sub>2</sub>                                                                                                  | 5.7×10 <sup>-12, 6</sup>                                                                         |
| CH <sub>3</sub> O <sub>2</sub> + NO (+O <sub>2</sub> ) → 0.9×CH <sub>2</sub> O + 0.9×HO <sub>2</sub> + 0.9×NO <sub>2</sub>                                                | 7.7×10 <sup>-12, 6</sup>                                                                         |
| OH + SO <sub>2</sub> (+O <sub>2</sub> ) → SO <sub>3</sub> + HO <sub>2</sub>                                                                                               | 8.9×10 <sup>-13, 8</sup>                                                                         |
| OH + MSIA (+O <sub>2</sub> ) → 0.53×H <sub>2</sub> SO <sub>3</sub> + 0.34×SO <sub>2</sub><br>+ 0.87×CH <sub>3</sub> O <sub>2</sub> + 0.13×CH <sub>3</sub> SO <sub>3</sub> | 9.0×10 <sup>-11, 7</sup>                                                                         |
| CH <sub>3</sub> SO <sub>3</sub> (+O <sub>2</sub> ) → SO <sub>3</sub> + CH <sub>3</sub> O <sub>2</sub>                                                                     | 0.076 <sup>2</sup>                                                                               |
| CH <sub>3</sub> SO <sub>3</sub> + CH <sub>2</sub> O → MSA + CHO                                                                                                           | 1.6×10 <sup>-15, 9#</sup>                                                                        |
| OH → wall                                                                                                                                                                 | 0.053 §                                                                                          |
| HO <sub>2</sub> → wall                                                                                                                                                    | 0.045 §                                                                                          |
| CH <sub>3</sub> O <sub>2</sub> → wall                                                                                                                                     | 0.018 §                                                                                          |
| MSIA → wall                                                                                                                                                               | 0.018 §                                                                                          |
| H <sub>2</sub> SO <sub>3</sub> → wall                                                                                                                                     | 0.018 §                                                                                          |
| CH <sub>3</sub> SO <sub>3</sub> → wall                                                                                                                                    | 0.018 §                                                                                          |
| SO <sub>3</sub> → wall                                                                                                                                                    | 0.018 §                                                                                          |

# this value is probably highly uncertain § diffusion-limited rate coefficient calculated for the LFT

#### 4. Additional figures

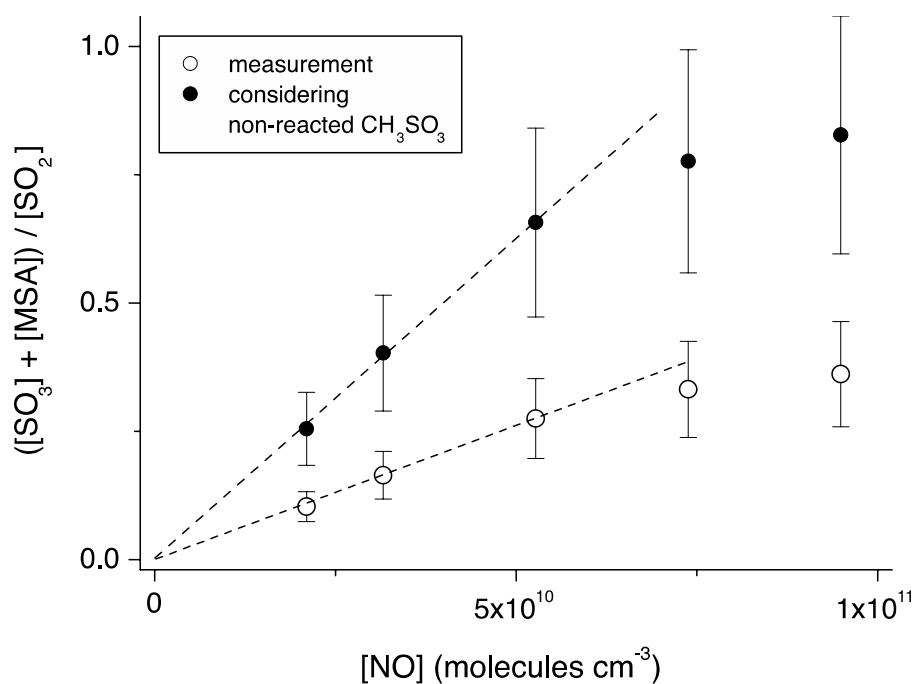

**Fig.S1** Ratio of CH<sub>3</sub>SO<sub>3</sub> products, SO<sub>3</sub> and MSA, and SO<sub>2</sub> as a function of NO concentration. The data were taken from the measurement series as depicted in Fig.1. Open circles represent the ratio of the measurement data. The amount of non-reacted CH<sub>3</sub>SO<sub>3</sub>, determined from modeling, is considered in the full circles. Only the first data points were taken for calculation of the slope  $\Delta y / \Delta x = 5.2 \times 10^{-12}$  (open circle) and  $1.25 \times 10^{-11} \text{ cm}^3 \text{ molecule}^{-1}$  (full circle).

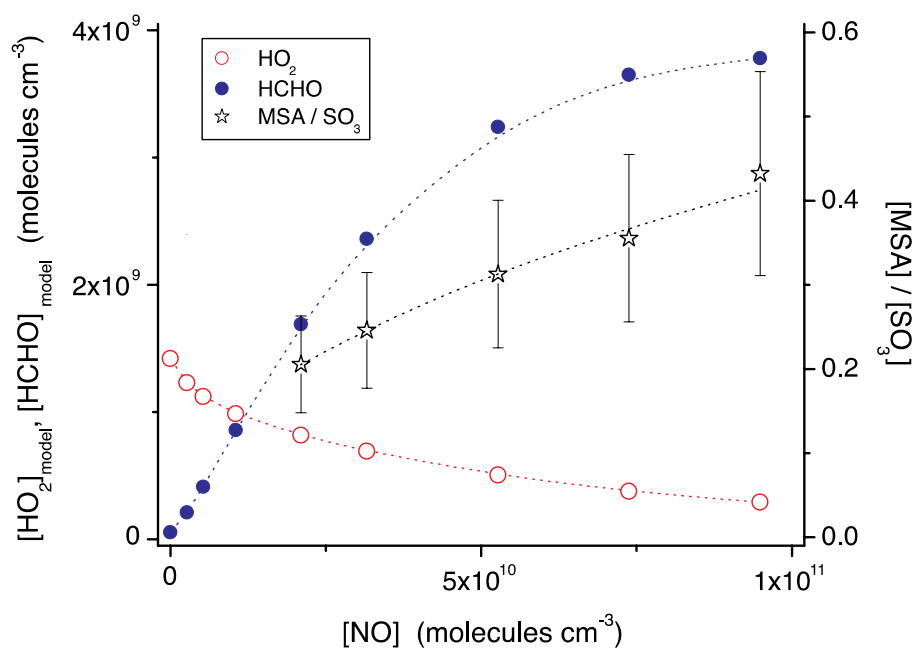

**Fig.S2** Concentrations of HO<sub>2</sub> radicals and HCHO at the LFT outflow from modeling as well as the measured ratio [MSA] / [SO<sub>3</sub>] as a function of NO concentration. The experimental data were taken from the measurement series as depicted in Fig.1.

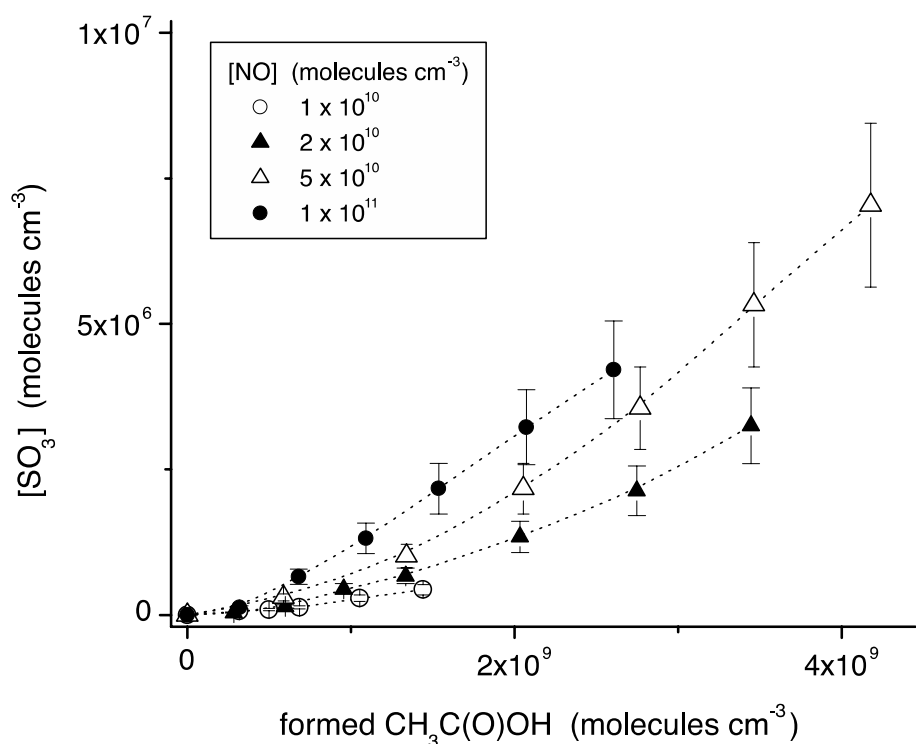

**Fig.S3** Formed SO<sub>3</sub> (2<sup>nd</sup> generation product) as a function of CH<sub>3</sub>C(O)OH (1<sup>st</sup> generation product) for different NO levels from the reaction of OH radicals with CH<sub>3</sub>S(O)CH<sub>3</sub>. Increasing CH<sub>3</sub>S(O)CH<sub>3</sub> conversion was achieved by rising IPN concentrations (rising OH radical concentrations) for constant CH<sub>3</sub>S(O)CH<sub>3</sub> concentration of  $4.2 \times 10^{10}$  molecules cm<sup>-3</sup>.

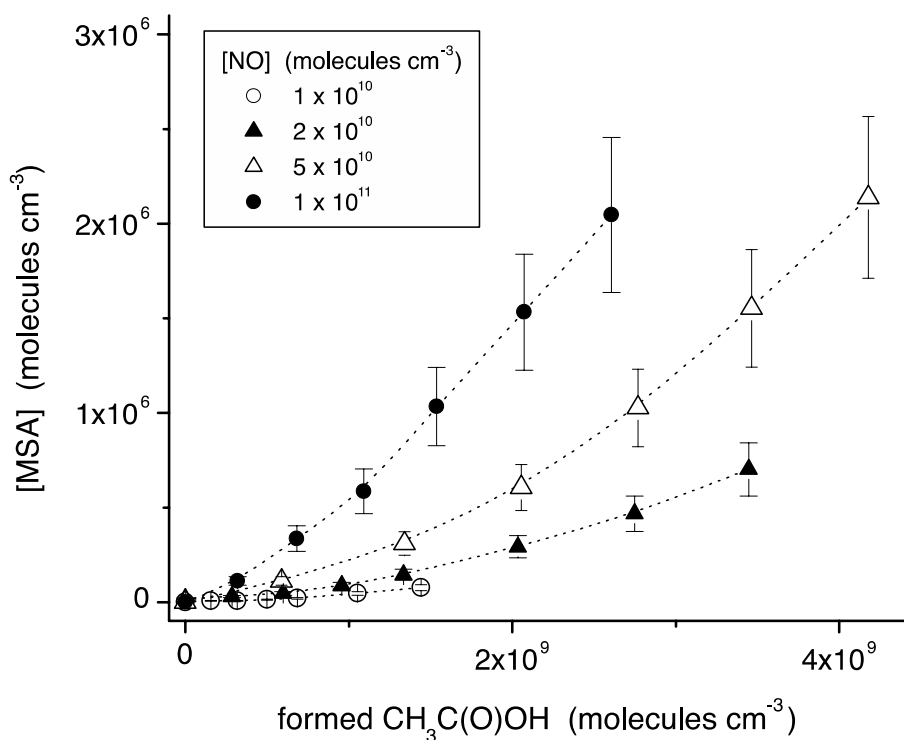

**Fig.S4** MSA concentrations (2<sup>nd</sup> generation product) as a function of formed CH<sub>3</sub>C(O)OH (1<sup>st</sup> generation product) for different NO levels from the measurement series shown in Fig.S3.

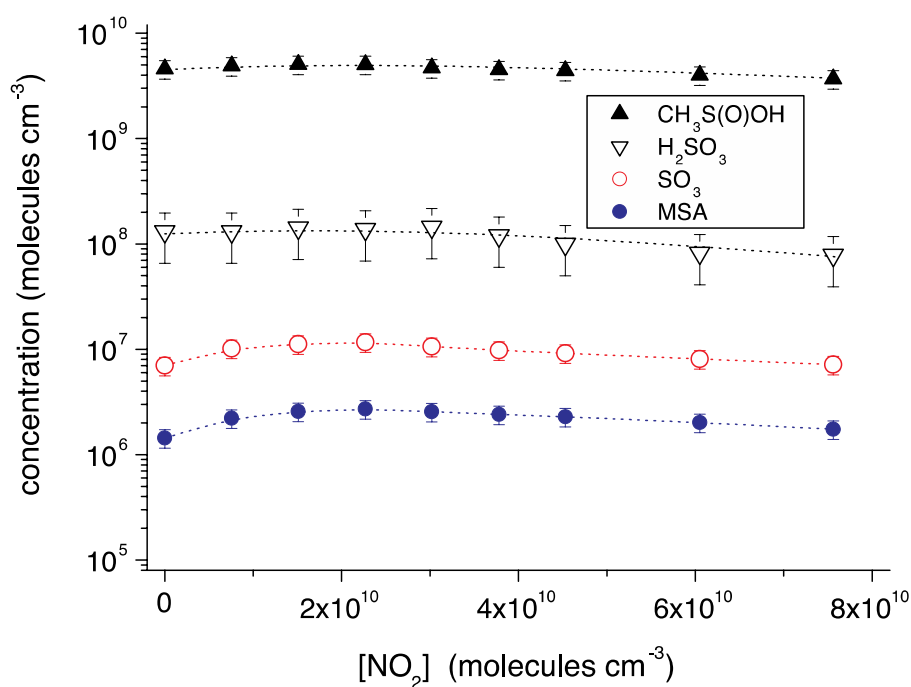

**Fig.S5** Formation of CH<sub>3</sub>S(O)OH, H<sub>2</sub>SO<sub>3</sub>, SO<sub>3</sub> and MSA (2<sup>nd</sup> generation products) from the OH + CH<sub>3</sub>S(O)CH<sub>3</sub> reaction as a function of added NO<sub>2</sub>, see also Fig.2. Error bars show the uncertainty derived from absolute calibrations. For H<sub>2</sub>SO<sub>3</sub>, the calibration factor of CH<sub>3</sub>S(O)OH was assumed with an uncertainty of  $\pm 50\%$ . Reactant concentrations are given in the caption of Fig.2.



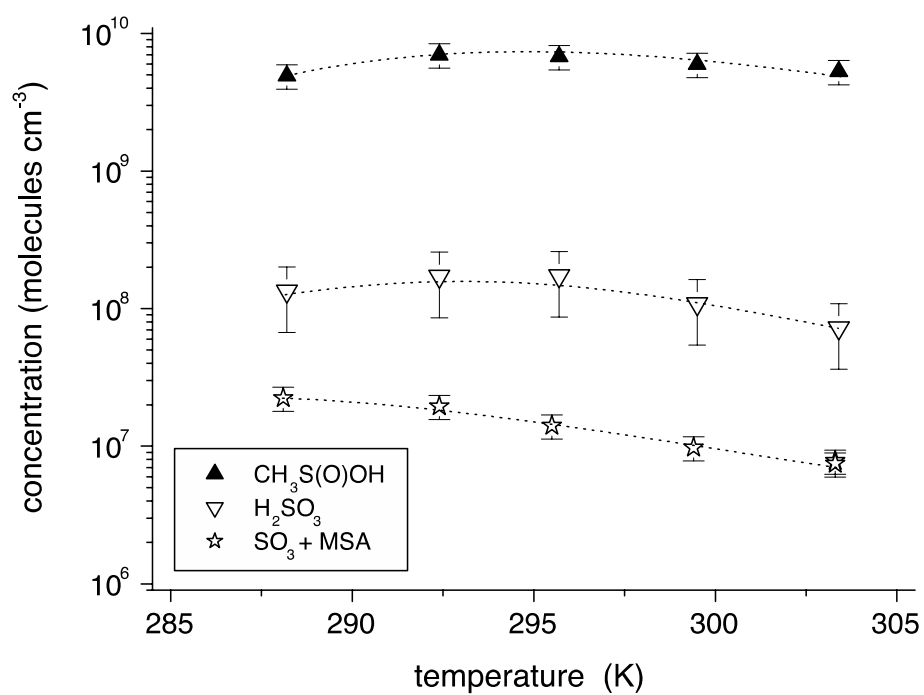

**Fig.S6** Product concentrations of CH<sub>3</sub>S(O)OH, H<sub>2</sub>SO<sub>3</sub> and the sum of SO<sub>3</sub> and MSA as a function of temperature from the measurement series shown in Fig.3.

## 5. References

1. T. Berndt, H. Herrmann, M. Sipila, M. Kulmala, *J. Phys. Chem. A*, **2016**, *120*, 10150-10159.
2. T. Berndt, E. H. Hoffmann, A. Tilgner, F. Stratmann, H. Herrmann, *Nat. Commun.*, **2023**, *14*, 4849.
3. J. D. Raff, B. J. Finlayson-Pitts, *Environ. Sci. Technol.*, **2010**, *44*, 8150-8155.
4. F. L. Eisele, D. J. Tanner, *J. Geophys. Res.*, **1991**, *96*, 9295-9308.
5. T. Berndt, E. H. Hoffmann, A. Tilgner, H. Herrmann, *Angew. Chem. Int. Ed.*, **2024**, *63*, e202405572.
6. R. Atkinson, D. L. Bauch, R. A. Cox, R. F. Hampson, Jr., J. A. Kerr, J. Troe, *J. Phys. Chem. Ref. Data*, **1992**, *21*, 1125-1568.
7. I. Barnes, J. Hjorth, N. Mihalopoulos, *Chem. Rev.* **2006**, *106*, 940-975.
8. R. Atkinson, D. L. Baulch, R. A. Cox, J. N. Crowley, R. F. Hampson, R. G. Hynes, M. E. Jenkin, M. J. Rossi, J. Troe, *Atmos. Chem. Phys.* **2004**, *4*, 1461-2004.
9. F. Yin, D. Grosjean, J. H. Seinfeld, *J. Atmos. Chem.*, **1990**, *11*, 309-364.
